# Supplementary material for: Subthalamic nucleus stimulation attenuates motor seizures via modulating the nigral orexin pathway
Source: Frontiers journal article supplement (doi:10.3389/fnins.2023.1157060), 2023-05-05
Supplement: Data_Sheet_1.PDF [file Data_Sheet_1.PDF]

# Subthalamic Nucleus Stimulation Attenuates Motor Seizures via Modulating the Nigral Orexin Pathway

## Supplementary materials

**Supplemental figure 1. Verification of motor epileptic model and STN-SNr circuit.** (A) Representative raw EEG in motor epileptic mouse with (a) baseline, (b) preictal, (c) focal seizure, (d) secondary generalized seizure and (e) suppression state after generalized seizure (green rectangle). (B) Fiber photometry of neural dynamics during motor seizures after triple injection of AAVs in M1, STN and SNr, confirming the activation of these brain regions during motor seizures. rAAV-CaMKIIa-GCaMp6m was injected into M1, STN, and rAAV-hSyn-GCaMp6m was used for SNr in wild-type C57/BL6 mice. (C) Representative images of the STN electrode location. Scale bar = 500  $\mu$ m. (D) Adjusted number of GS/h for figure 1N. The time was corrected according to latency to GS, and to be specific, adjusted number of GS/h = total number of GS / (3h – latency to GS). \*\*p < 0.01. Data are presented as means  $\pm$  SD. Colored asterisk indicates the comparison of the corresponding group and the penicillin + sham STN-DBS group. Detailed statistical methods and data are provided in Supplementary table 3. (E) Immunofluorescence analysis was performed with antibodies against c-Fos (red) and NeuN (green) in brain sections of M1, STN and SNr. Nuclei were fluorescently labeled with DAPI (blue), scale bar = 500  $\mu$ m for whole brain perspective; scale bar = 50  $\mu$ m for zoomed perspective. Verification of the classic STN-SNr projections by (F) anterograde and (G) retrograde tracer, scale bar = 100  $\mu$ m.

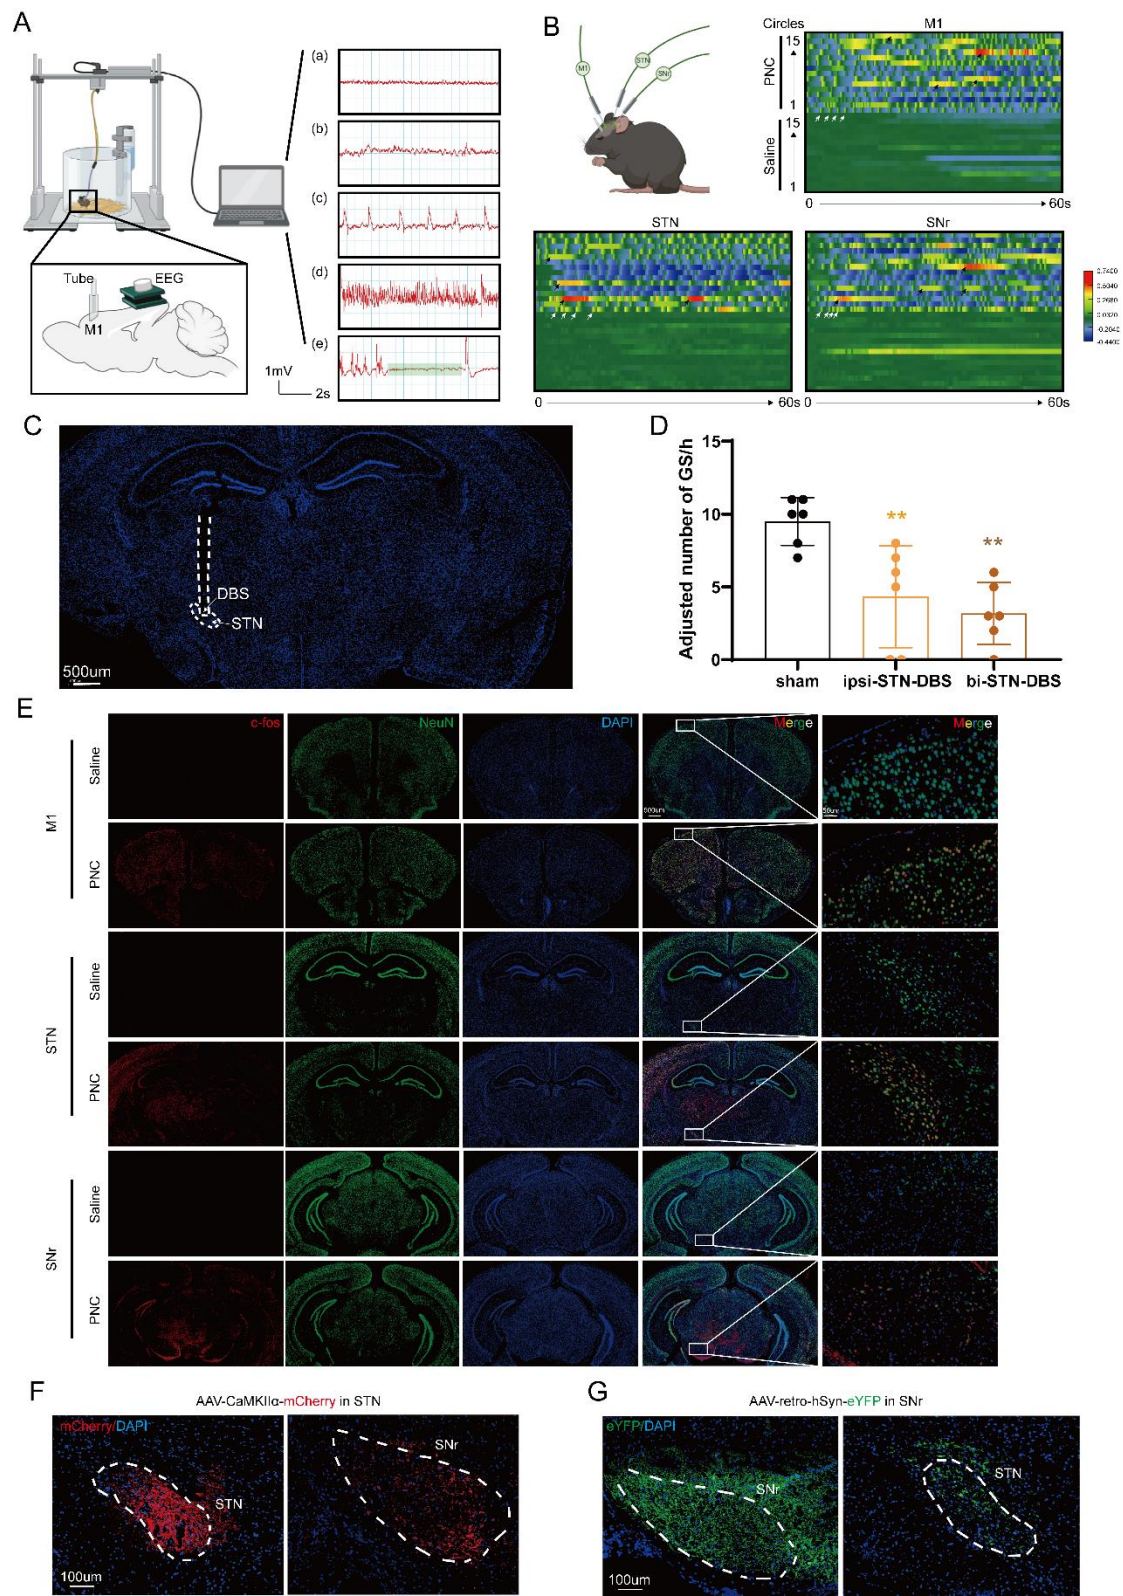



**Supplemental figure 3. Adjusted number of GS/h** for (A) figure 4K, (B) 6K and (C) 7P. The time was corrected according to latency to GS, and to be specific, adjusted number of GS/h = total number of GS / (3h – latency to GS). \* $p < 0.05$ , \*\* $p < 0.01$ , \*\*\* $p < 0.001$ . Data are presented as means  $\pm$  SD. Colored asterisk indicates the comparison of the corresponding group and the control (first) group. Black asterisk with two different colored horizontal lines to the left and right represents comparison of the corresponding two groups. Detailed statistical methods and data are provided in Supplementary table 3.

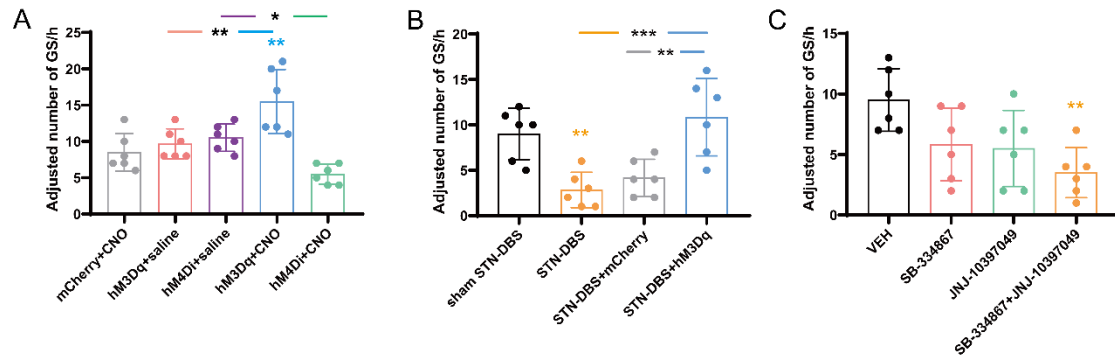

**Supplemental table 1. Mice mortality and exclusion**

| Experiment                                       | Group                            | Subtotal | Mortality (%) | Excluded                                                                                   | Included |
|--------------------------------------------------|----------------------------------|----------|---------------|--------------------------------------------------------------------------------------------|----------|
| Validation of model<br>(EEG and IF)              | Saline                           | 3        | 0 (0)         | 0                                                                                          | 3        |
|                                                  | PNC                              | 4        | 1 (25)        | 0                                                                                          | 3        |
| Validation of model<br>(Ca <sup>2+</sup> signal) | PNC                              | 4        | 0 (0)         | 1 (inaccurate placement of fiber)                                                          | 3        |
| Anterograde trace                                | -                                | 3        | 0 (0)         | 0                                                                                          | 3        |
| Retrograde trace                                 | -                                | 3        | 0 (0)         | 0                                                                                          | 3        |
| STN-DBS (Ca <sup>2+</sup> signal)                | Saline/ PNC                      | 7        | 2 (29)        | 0                                                                                          | 5        |
| STN-DBS (EEG and IF)                             | PNC + sham STN-DBS               | 9        | 2 (22)        | 1 (no seizure)                                                                             | 6        |
|                                                  | PNC + ipsilateral STN-DBS        | 7        | 1 (14)        | 0                                                                                          | 6        |
|                                                  | PNC + bilateral STN-DBS          | 9        | 1 (11)        | 2 (inaccurate placement of DBS)                                                            | 6        |
| STN Chr2                                         | Blue light ON/OFF                | 10       | 3 (30)        | 2 (inaccurate placement of fiber)                                                          | 5        |
|                                                  | Yellow light ON/OFF              | 7        | 1 (14)        | 0                                                                                          | 6        |
| STN eNpHR                                        | Yellow light ON/OFF              | 6        | 0 (0)         | 0                                                                                          | 6        |
|                                                  | Blue light ON/OFF                | 8        | 2 (25)        | 0                                                                                          | 6        |
| STN-SNr hM3Dq/<br>hM4Di                          | mCherry + CNO (pre/CNO/post)     | 11       | 0/1/2 (27)    | 2 (one for no seizure at CNO; one for poor condition after pre)                            | 6        |
|                                                  | hM3Dq + saline (pre/saline/post) | 10       | 1/1/1 (30)    | 1 (cement shedding)                                                                        | 6        |
|                                                  | hM4Di + saline (pre/saline/post) | 9        | 0/1/1 (23)    | 1 (insufficient viral infection)                                                           | 6        |
|                                                  | hM3Dq + CNO (pre/CNO/post)       | 12       | 2/2/1 (42)    | 1 (plugged tube before CNO)                                                                | 6        |
|                                                  | hM4Di + CNO (pre/CNO/post)       | 10       | 1/0/1 (20)    | 1 (one for maybe infection before pre after surgery; one for insufficient viral infection) | 6        |
| STN-SNr                                          | Chr2 + blue light ON/OFF         | 8        | 2 (25)        | 0                                                                                          | 6        |
| Chr2/eYFP                                        | eYFP + blue light ON/OFF         | 7        | 0 (0)         | 1 (losing too much weight)                                                                 | 6        |
| STN-SNr                                          | eNpHR + yellow light ON/OFF      | 7        | 1 (14)        | 0                                                                                          | 6        |
| eNpHR/eYFP                                       | eYFP + yellow light ON/OFF       | 8        | 2 (25)        | 0                                                                                          | 6        |
| STN-DBS hM3Dq                                    | Sham STN-DBS <sup>#</sup>        | 8        | 2 (25)        | 0                                                                                          | 6        |
|                                                  | STN-DBS <sup>*</sup>             | 8        | 1 (12.5)      | 1 (inaccurate placement of DBS)                                                            | 6        |
|                                                  | STN-DBS + mCherry                | 7        | 1 (14)        | 0                                                                                          | 6        |
|                                                  | STN-DBS + hM3Dq                  | 10       | 2 (20)        | 2 (poor condition;                                                                         | 6        |

|                                                |                          | insufficient viral infection) |                |                |            |
|------------------------------------------------|--------------------------|-------------------------------|----------------|----------------|------------|
| Orexin receptor 1/2 (IF)                       | -                        | 3                             | 0 (0)          | 0              | 3          |
| Orexin A/B and orexin receptor 1/2 (ELISA, WB) | Saline                   | 6                             | 0 (0)          | 0              | 6          |
|                                                | PNC                      | 7                             | 1 (14)         | 0              | 6          |
|                                                | Sham STN-DBS             | Use above-mentioned mice #    |                |                |            |
|                                                | STN-DBS                  | Use above-mentioned mice *    |                |                |            |
| Antagonists                                    | Vehicle                  | 7                             | 1 (14)         | 0              | 6          |
|                                                | SB-334867                | 7                             | 1 (14)         | 0              | 6          |
|                                                | JNJ-10397049             | 6                             | 0 (0)          | 0              | 6          |
|                                                | SB-334867 + JNJ-10397049 | 7                             | 0 (0)          | 1 (no seizure) | 6          |
| <b>Total</b>                                   |                          | <b>238</b>                    | <b>42 (18)</b> | <b>18</b>      | <b>178</b> |

**Supplemental table 2. Resource Identifiers for antibodies**

| Target antigen  | c-fos                                  | Orexin A                       | Orexin B                       | Orexin receptor 1                                     | Orexin receptor 2                                                   |
|-----------------|----------------------------------------|--------------------------------|--------------------------------|-------------------------------------------------------|---------------------------------------------------------------------|
| Antibody name   | Anti-c-Fos antibody                    | Anti-Orexin A antibody         | Anti-Orexin B antibody         | Orexin Receptor 1 (HCRTR1) Rabbit Polyclonal Antibody | RABBIT ANTI-OREXIN-2 RECEPTOR AFFINITY PURIFIED POLYCLONAL ANTIBODY |
| Reactivity      | Human, Porcine, Rat, Cow, Mouse, Horse | Mouse, Rat                     | Mouse, Rat                     | Rat, Mouse, Human                                     | Rat, Mouse, Human                                                   |
| Host            | Mouse                                  | Rabbit                         | Rabbit                         | Rabbit                                                | Rabbit                                                              |
| Vendor          | Abcam                                  | Abcam                          | Abcam                          | OriGene                                               | Millipore                                                           |
| Cat number      | ab208942                               | ab255294                       | ab255293                       | TA376968                                              | AB3094                                                              |
| RRID            | AB_2747772                             | N/A                            | N/A                            | N/A                                                   | AB_91358                                                            |
| Proper Citation | Abcam Cat# ab208942, RRID: AB_2747772  | Abcam Cat# ab255294            | Abcam Cat# ab255293            | OriGene Cat# TA376968                                 | Millipore Cat# AB3094, RRID: AB_91358                               |
| Reference       | Reference (45)                         | Reference (0)                  | Reference (0)                  | Reference (2)                                         | Reference (3)                                                       |
| Clonality       | Monoclonal                             | Monoclonal                     | Monoclonal                     | Polyclonal                                            | Polyclonal                                                          |
| Clone ID        | 2H2                                    | EPR22803-259                   | EPR22803-18                    | N/A                                                   | N/A                                                                 |
| Comments        | WB, ICC/IF, IHC                        | Dot blot, IHC-P, IHC-Fr, ELISA | Dot blot, IHC-P, IHC-Fr, ELISA | IF, WB                                                | IF, ELISA, WB                                                       |

|                       |           |               |               |                       |                      |
|-----------------------|-----------|---------------|---------------|-----------------------|----------------------|
| Applicate<br>dilution | IF=1:1000 | ELISA= 1:1000 | ELISA= 1:1000 | IF=1:100<br>WB=1:1000 | IF=1:200<br>WB=1:500 |
|-----------------------|-----------|---------------|---------------|-----------------------|----------------------|

---



**Supplemental table 3. Statistical table**

|         | Description                             | Normality tests | Test used                                                                                      | Stat-value                                                                                                                                                                                                                                                                                                                                                                                                                       | One- or two-tailed P value? |
|---------|-----------------------------------------|-----------------|------------------------------------------------------------------------------------------------|----------------------------------------------------------------------------------------------------------------------------------------------------------------------------------------------------------------------------------------------------------------------------------------------------------------------------------------------------------------------------------------------------------------------------------|-----------------------------|
| Fig. 1H | Spikes/min                              | Passed          | Two-way repeated ANOVA with Geisser-Greenhouse's correction followed by post hoc Tukey's tests | Interaction: $F(30, 225) = 2.681$ , $P < 0.0001$ ;<br>Time: $F(6.847, 102.7) = 11.63$ , $P < 0.0001$ ;<br>Group: $F(2, 15) = 97.35$ , $P < 0.0001$ ;<br>For sham vs. ipsi, $P < 0.0001$ ;<br>For sham vs. bi, $P < 0.0001$ .                                                                                                                                                                                                     | Two-tailed                  |
| Fig. 1I | Spike amplitude (mV)                    | Passed          | Two-way repeated ANOVA with Geisser-Greenhouse's correction followed by post hoc Tukey's tests | Interaction: $F(30, 225) = 1.519$ , $P = 0.0477$ ;<br>Time: $F(7.071, 106.1) = 1.560$ , $P = 0.1547$ ;<br>Group: $F(2, 15) = 7.254$ , $P = 0.0063$ ;<br>For sham vs. ipsi, $P = 0.0006$ ;<br>For sham vs. bi, $P = 0.0123$ .                                                                                                                                                                                                     | Two-tailed                  |
| Fig. 1J | EEG power ( $\mu V^2$ )                 | Passed          | Two-way ANOVA followed by post hoc Tukey's tests                                               | Interaction: $F(8, 75) = 6.847$ , $P < 0.0001$ ;<br>Band: $F(4, 75) = 238.5$ , $P < 0.0001$ ;<br>Group: $F(2, 75) = 35.30$ , $P < 0.0001$ ;<br>For $\delta$ , sham vs. ipsi, $P < 0.0001$ ;<br>For $\delta$ , sham vs. bi, $P < 0.0001$ ;<br>For $\beta$ , sham vs. ipsi, $P < 0.0001$ ;<br>For $\beta$ , sham vs. bi, $P < 0.0001$ ;<br>For $\beta$ , ipsi vs. bi, $P = 0.0002$ ;<br>For $\gamma$ , sham vs. bi, $P < 0.0443$ . | Two-tailed                  |
| Fig. 1K | Latency to FS (min)                     | Not necessary   | Kruskal-Wallis test followed by post hoc Dunn's tests                                          | KW statistic = 7.997, $P = 0.0122$ ;<br>For sham vs. ipsi, $P = 0.0502$ ;<br>For sham vs. bi, $P = 0.0371$ .                                                                                                                                                                                                                                                                                                                     | Two-tailed                  |
| Fig. 1L | Latency to GS (min)                     | Not necessary   | Kruskal-Wallis test followed by post hoc Dunn's tests                                          | KW statistic = 8.772, $P = 0.0063$ ;<br>For sham vs. ipsi, $P = 0.0447$ ;<br>For sham vs. bi, $P = 0.0222$ .                                                                                                                                                                                                                                                                                                                     | Two-tailed                  |
| Fig. 1M | Number of FS/min                        | Not necessary   | Kruskal-Wallis test followed by post hoc Dunn's tests                                          | KW statistic = 8.272, $P = 0.0095$ ;<br>For sham vs. ipsi, $P = 0.0466$ ;<br>For sham vs. bi, $P = 0.0318$ .                                                                                                                                                                                                                                                                                                                     | Two-tailed                  |
| Fig. 1N | Number of GS/h                          | Not necessary   | Kruskal-Wallis test followed by post hoc Dunn's tests                                          | KW statistic = 11.50, $P = 0.0005$ ;<br>For sham vs. ipsi, $P = 0.0272$ ;<br>For sham vs. bi, $P = 0.0044$ .                                                                                                                                                                                                                                                                                                                     | Two-tailed                  |
| Fig. 1O | Seizure stage                           | Passed          | Two-way repeated ANOVA with Geisser-Greenhouse's correction followed by post hoc Tukey's tests | Interaction: $F(30, 225) = 1.545$ , $P = 0.0411$ ;<br>Time: $F(6.506, 97.59) = 19.84$ , $P < 0.0001$ ;<br>Group: $F(2, 15) = 3.432$ , $P = 0.0593$ ;<br>For sham vs. ipsi, $P = 0.1758$ ;<br>For sham vs. bi, $P = 0.1362$ .                                                                                                                                                                                                     | Two-tailed                  |
| Fig. 1Q | Relative fluorescent intensity of c-fos | Passed          | Two-way ANOVA followed by post hoc Tukey's tests                                               | Interaction: $F(4, 45) = 7.986$ , $P < 0.0001$ ;<br>Brain region: $F(2, 45) = 5.378$ , $P = 0.0080$ ;<br>Group: $F(2, 45) = 404.5$ , $P < 0.0001$ ;<br>For M1, sham vs. ipsi, $P < 0.0001$ ;<br>For M1, sham vs. bi, $P < 0.0001$ ;                                                                                                                                                                                              | Two-tailed                  |

|         |                         |          |                                                                                                    |                                                                                                                                                                                                                                                                                                                                                                         |            |
|---------|-------------------------|----------|----------------------------------------------------------------------------------------------------|-------------------------------------------------------------------------------------------------------------------------------------------------------------------------------------------------------------------------------------------------------------------------------------------------------------------------------------------------------------------------|------------|
|         |                         |          |                                                                                                    | For STN, sham vs. ipsi, $P<0.0001$ ;<br>For STN, sham vs. bi, $P<0.0001$ ;<br>For STN, ipsi vs. bi, $P=0.0416$ ;<br>For SNr, sham vs. ipsi, $P<0.0001$ ;<br>For SNr, sham vs. bi, $P<0.0001$ .                                                                                                                                                                          |            |
| Fig. 2E | Spikes/min              | Passed   | Two-way repeated ANOVA with Geisser-Greenhouse's correction followed by post hoc Sidak tests       | Interaction: $F(15, 135) = 3.616$ , $P<0.0001$ ;<br>Time: $F(4.689, 42.20) = 4.071$ , $P=0.0049$ ;<br>Group: $F(1, 9) = 23.98$ , $P=0.0009$ ;<br>For 24 min, blue vs. yellow, $P=0.0342$ ;<br>For 54 min, blue vs. yellow, $P=0.0158$ .                                                                                                                                 | Two-tailed |
| Fig. 2F | Spike amplitude (mV)    | Passed   | Two-way repeated ANOVA with Geisser-Greenhouse's correction followed by post hoc Sidak tests       | Interaction: $F(15, 135) = 5.568$ , $P<0.0001$ ;<br>Time: $F(5.236, 47.13) = 4.921$ , $P=0.0009$ ;<br>Group: $F(1, 9) = 9.365$ , $P=0.0136$ ;<br>For 24 min, blue vs. yellow, $P=0.0122$ .                                                                                                                                                                              | Two-tailed |
| Fig. 2G | EEG power ( $\mu V^2$ ) | Passed   | Two-way ANOVA followed by post hoc Tukey's tests                                                   | Interaction: $F(8, 95) = 4.918$ , $P<0.0001$ ;<br>Band: $F(4, 95) = 74.21$ , $P<0.0001$ ;<br>Group: $F(2, 95) = 25.50$ , $P<0.0001$ ;<br>For $\delta$ , blue vs. no, $P<0.0001$ ;<br>For $\delta$ , blue vs. yellow, $P<0.0001$ ;<br>For $\theta$ , blue vs. no, $P=0.0052$ ;<br>For $\beta$ , blue vs. no, $P=0.0001$ ;<br>For $\beta$ , blue vs. yellow, $P=0.0020$ . | Two-tailed |
| Fig. 2H | Number of FS/min        | Passed   | Paired and Unpaired T tests                                                                        | For blue vs. no, paired $t=3.359$ , $df=4$ , $P=0.0283$ ;<br>For blue vs. yellow, unpaired $t=4.504$ , $df=9$ , $P=0.0015$ .                                                                                                                                                                                                                                            | Two-tailed |
| Fig. 2I | Number of GS/h          | Passed   | Paired and Unpaired T tests                                                                        | For blue vs. no, paired $t=2.922$ , $df=4$ , $P=0.0432$ ;<br>For blue vs. yellow, unpaired $t=3.061$ , $df=9$ , $P=0.0135$ .                                                                                                                                                                                                                                            | Two-tailed |
| Fig. 2J | Seizure stage           | Unpassed | Mann-Whitney U test                                                                                | Mann-Whitney $U=49$ , $P=0.0021$ .                                                                                                                                                                                                                                                                                                                                      | Two-tailed |
|         |                         |          | Pilot two-way repeated ANOVA with Geisser-Greenhouse's correction followed by post hoc Sidak tests | Interaction: $F(15, 135) = 2.414$ , $P=0.0039$ ;<br>Time: $F(4.877, 43.89) = 21.09$ , $P<0.0001$ ;<br>Group: $F(1, 9) = 63.91$ , $P<0.0001$ ;<br>For 48 min, blue vs. yellow, $P=0.0264$ ;<br>For 60 min, blue vs. yellow, $P=0.0083$                                                                                                                                   |            |
| Fig. 3E | Spikes/min              | Passed   | Two-way repeated ANOVA with Geisser-Greenhouse's correction followed by post hoc Sidak tests       | Interaction: $F(15, 150) = 2.363$ , $P=0.0045$ ;<br>Time: $F(15, 150) = 1.716$ , $P=0.0005$ ;<br>Group: $F(1, 10) = 30.34$ , $P=0.0003$ ;<br>For 30 min, blue vs. yellow, $P=0.0295$ ;<br>For 42 min, blue vs. yellow, $P=0.0451$ ;<br>For 54 min, blue vs. yellow, $P=0.0159$ .                                                                                        | Two-tailed |
| Fig. 3F | Spike amplitude (mV)    | Passed   | Two-way repeated ANOVA with Geisser-Greenhouse's correction                                        | Interaction: $F(15, 150) = 2.507$ , $P=0.0025$ ;<br>Time: $F(4.679, 46.79) = 7.213$ , $P<0.0001$ ;<br>Group: $F(1, 10) = 8.011$ , $P=0.0178$ ;                                                                                                                                                                                                                          | Two-tailed |

|         |                         |          |                                                                                                    |                                                                                                                                                                                                                                                                                                                                                                                                                                                    |            |
|---------|-------------------------|----------|----------------------------------------------------------------------------------------------------|----------------------------------------------------------------------------------------------------------------------------------------------------------------------------------------------------------------------------------------------------------------------------------------------------------------------------------------------------------------------------------------------------------------------------------------------------|------------|
|         |                         |          | followed by post hoc Sidak tests                                                                   | For 24 min, blue vs. yellow, $P = 0.0464$ .                                                                                                                                                                                                                                                                                                                                                                                                        |            |
| Fig. 3G | EEG power ( $\mu V^2$ ) | Passed   | Two-way ANOVA followed by post hoc Tukey's tests                                                   | Interaction: $F(8, 105) = 1.660$ , $P = 0.1168$ ;<br>Band: $F(4, 105) = 77.15$ , $P < 0.0001$ ;<br>Group: $F(2, 105) = 17.95$ , $P < 0.0001$ ;<br>For $\delta$ , yellow vs. no, $P = 0.0039$ ;<br>For $\delta$ , yellow vs. blue, $P = 0.0102$ ;<br>For $\alpha$ , yellow vs. blue, $P = 0.0401$ ;<br>For $\beta$ , yellow vs. no, $P = 0.0001$ ;<br>For $\beta$ , yellow vs. blue, $P < 0.0001$ ;<br>For $\gamma$ , yellow vs. no, $P = 0.0478$ . | Two-tailed |
| Fig. 3H | Number of FS/min        | Passed   | Paired and Unpaired T tests                                                                        | For yellow vs. no, paired $t = 3.997$ , $df = 5$ , $P = 0.0104$ ;<br>For yellow vs. blue, unpaired $t = 3.654$ , $df = 10$ , $P = 0.0044$ .                                                                                                                                                                                                                                                                                                        | Two-tailed |
| Fig. 3I | Number of GS/h          | Passed   | Paired and Unpaired T tests                                                                        | For yellow vs. no, paired $t = 3.782$ , $df = 5$ , $P = 0.0129$ ;<br>For yellow vs. blue, unpaired $t = 1.980$ , $df = 10$ , $P = 0.0759$ .                                                                                                                                                                                                                                                                                                        | Two-tailed |
| Fig. 3J | Seizure stage           | Unpassed | Mann-Whitney U test                                                                                | Mann-Whitney $U = 46.50$ , $P = 0.0013$ .                                                                                                                                                                                                                                                                                                                                                                                                          | Two-tailed |
|         |                         |          | Pilot two-way repeated ANOVA with Geisser-Greenhouse's correction followed by post hoc Sidak tests | Interaction: $F(15, 150) = 0.9394$ , $P = 0.5223$ ;<br>Time: $F(5.877, 58.77) = 14.29$ , $P < 0.0001$ ;<br>Group: $F(1, 10) = 34.39$ , $P = 0.0002$ .                                                                                                                                                                                                                                                                                              |            |
| Fig. 4E | Spikes/min              | Passed   | Two-way repeated ANOVA with Geisser-Greenhouse's correction followed by post hoc Sidak tests       | Interaction: $F(60, 375) = 1.504$ , $P = 0.0131$ ;<br>Time: $F(8.628, 215.7) = 0.8088$ , $P = 0.6039$ ;<br>Group: $F(4, 25) = 19.27$ , $P < 0.0001$ ;<br>For mCherry+CNO vs. hM3Dq+CNO, $P < 0.0001$ ;<br>For mCherry+CNO vs. hM4Di+CNO, $P < 0.0001$ ;<br>For hM3Dq+saline vs. hM3Dq+CNO, $P < 0.0001$ ;<br>For hM4Di+saline vs. hM4Di+CNO, $P < 0.0001$ .                                                                                        | Two-tailed |
| Fig. 4F | Spike amplitude (mV)    | Passed   | Two-way repeated ANOVA with Geisser-Greenhouse's correction followed by post hoc Sidak tests       | Interaction: $F(60, 375) = 1.11$ , $P = 0.2767$ ;<br>Time: $F(8.333, 208.3) = 5.087$ , $P < 0.0001$ ;<br>Group: $F(4, 25) = 181.8$ , $P < 0.0001$ ;<br>For mCherry+CNO vs. hM3Dq+CNO, $P < 0.0001$ ;<br>For mCherry+CNO vs. hM4Di+CNO, $P < 0.0001$ ;<br>For hM3Dq+saline vs. hM3Dq+CNO, $P < 0.0001$ ;<br>For hM4Di+saline vs. hM4Di+CNO, $P < 0.0001$ .                                                                                          | Two-tailed |
| Fig. 4G | EEG power ( $\mu V^2$ ) | Passed   | Two-way ANOVA followed by post hoc Tukey's tests                                                   | Interaction: $F(16, 125) = 5.660$ , $P < 0.0001$ ;<br>Band: $F(4, 125) = 203.3$ , $P < 0.0001$ ;<br>Group: $F(4, 125) = 29.53$ , $P < 0.0001$ ;<br>For $\delta$ , mCherry+CNO vs. hM3Dq+CNO, $P < 0.0001$ ;<br>For $\delta$ , hM3Dq+saline vs. hM3Dq+CNO, $P < 0.0001$ ;<br>For $\delta$ , hM4Di+saline vs. hM4Di+CNO, $P = 0.0067$ ;                                                                                                              | Two-tailed |

|         |                         |          |                                                                                              |                                                                                                                                                                                                                                                                                              |            |
|---------|-------------------------|----------|----------------------------------------------------------------------------------------------|----------------------------------------------------------------------------------------------------------------------------------------------------------------------------------------------------------------------------------------------------------------------------------------------|------------|
|         |                         |          |                                                                                              | For $\theta$ , mCherry+CNO vs. hM3Dq+CNO, $P=0.0195$ ;<br>For $\beta$ , mCherry+CNO vs. hM3Dq+CNO, $P=0.0048$ ;<br>For $\beta$ , mCherry+CNO vs. hM4Di+CNO, $P<0.0001$ ;<br>For $\beta$ , hM3Dq+saline vs. hM3Dq+CNO, $P=0.0109$ ;<br>For $\beta$ , hM4Di+saline vs. hM4Di+CNO, $P=0.0038$ . |            |
| Fig. 4H | Latency to FS (min)     | Passed   | One-way ANOVA followed by post hoc Tukey's tests                                             | $F(4, 25) = 3.970$ , $P=0.0125$ ;<br>For mCherry+CNO vs. hM4Di+CNO, $P=0.0338$ ;<br>For hM4Di+saline vs. hM4Di+CNO, $P=0.0338$ .                                                                                                                                                             | Two-tailed |
| Fig. 4I | Latency to GS (min)     | Passed   | One-way ANOVA followed by post hoc Tukey's tests                                             | $F(4, 25) = 14.35$ , $P<0.0001$ ;<br>For mCherry+CNO vs. hM3Dq+CNO, $P=0.0384$ ;<br>For mCherry+CNO vs. hM4Di+CNO, $P=0.0023$ ;<br>For hM4Di+saline vs. hM4Di+CNO, $P=0.0004$ .                                                                                                              | Two-tailed |
| Fig. 4J | Number of FS/min        | Passed   | One-way ANOVA followed by post hoc Tukey's tests                                             | $F(4, 25) = 11.62$ , $P<0.0001$ ;<br>For mCherry+CNO vs. hM3Dq+CNO, $P=0.0123$ ;<br>For mCherry+CNO vs. hM4Di+CNO, $P=0.0290$ ;<br>For hM4Di+saline vs. hM4Di+CNO, $P=0.0381$ .                                                                                                              | Two-tailed |
| Fig. 4K | Number of GS/h          | Passed   | One-way ANOVA followed by post hoc Tukey's tests                                             | $F(4, 25) = 13.59$ , $P<0.0001$ ;<br>For mCherry+CNO vs. hM3Dq+CNO, $P=0.0003$ ;<br>For hM3Dq+saline vs. hM3Dq+CNO, $P=0.0018$ ;<br>For hM4Di+saline vs. hM4Di+CNO, $P=0.0358$ .                                                                                                             | Two-tailed |
| Fig. 4L | Seizure stage           | Passed   | Two-way repeated ANOVA with Geisser-Greenhouse's correction followed by post hoc Sidak tests | Interaction: $F(60, 375) = 1.089$ , $0.3139$ ;<br>Time: $F(8.234, 205.8) = 36.14$ , $0.0001$ ;<br>Group: $F(4, 25) = 58.35$ , $0.0001$ ;<br>For mCherry+CNO vs. hM3Dq+CNO, $P<0.0001$ ;<br>For hM3Dq+saline vs. hM3Dq+CNO, $P<0.0001$ .                                                      | Two-tailed |
| Fig. 5E | Spikes/min              | Passed   | Two-way repeated ANOVA with Geisser-Greenhouse's correction followed by post hoc Sidak tests | Interaction: $F(15, 150) = 3.193$ , $0.0001$ ;<br>Time: $F(15, 150) = 4.769$ , $0.0020$ ;<br>Group: $F(1, 10) = 8.004$ , $0.0179$ ;<br>For 30 min, ChR2 vs. eYFP, $P=0.0064$ .                                                                                                               | Two-tailed |
| Fig. 5F | Spike amplitude (mV)    | Passed   | Two-way repeated ANOVA with Geisser-Greenhouse's correction followed by post hoc Sidak tests | Interaction: $F(15, 150) = 1.844$ , $P=0.0335$ ;<br>Time: $F(5.581, 55.81) = 1.994$ , $0.0866$ ;<br>Group: $F(1, 10) = 0.2267$ , $P=0.6442$ .                                                                                                                                                | Two-tailed |
| Fig. 5G | EEG power ( $\mu V^2$ ) | Unpassed | Mann-Whitney U tests                                                                         | For $\delta$ , Mann-Whitney $U=5$ , $P=0.0411$ ;<br>For $\beta$ , Mann-Whitney $U=8$ , $P=0.1320$ .                                                                                                                                                                                          | Two-tailed |
| Fig. 5H | Number of FS/min        | Passed   | Paired T test                                                                                | $t=4.183$ , $df=5$ , $P=0.0086$ .                                                                                                                                                                                                                                                            | Two-tailed |
| Fig. 5I | Number of GS/h          | Passed   | Paired T test                                                                                | $t=2.708$ , $df=5$ , $P=0.0424$ .                                                                                                                                                                                                                                                            | Two-tailed |
| Fig.    | Seizure                 | Passed   | Two-way repeated                                                                             | Interaction: $F(15, 150) = 2.003$ , $P=0.0184$ ;                                                                                                                                                                                                                                             | Two-tailed |

|         |                         |          |                                                                                                    |                                                                                                                                                                                                                                                                                                         |            |
|---------|-------------------------|----------|----------------------------------------------------------------------------------------------------|---------------------------------------------------------------------------------------------------------------------------------------------------------------------------------------------------------------------------------------------------------------------------------------------------------|------------|
| 5J      | stage                   |          | ANOVA with Geisser-Greenhouse's correction followed by post hoc Sidak tests                        | Time: $F(5.503, 55.03) = 19.80, P < 0.0001$ ;<br>Group: $F(1, 10) = 7.737, P = 0.0194$ .                                                                                                                                                                                                                |            |
| Fig. 5K | Spikes/min              | Passed   | Two-way repeated ANOVA with Geisser-Greenhouse's correction followed by post hoc Sidak tests       | Interaction: $F(15, 150) = 1.742, P = 0.0485$ ;<br>Time: $F(5.329, 53.29) = 4.083, P = 0.0027$ ;<br>Group: $F(1, 10) = 0.5042, P = 0.4939$ .                                                                                                                                                            | Two-tailed |
| Fig. 5L | Spike amplitude (mV)    | Unpassed | Mann-Whitney U test                                                                                | Mann-Whitney $U = 93, P = 0.1930$ .                                                                                                                                                                                                                                                                     | Two-tailed |
|         |                         |          | Pilot two-way repeated ANOVA with Geisser-Greenhouse's correction followed by post hoc Sidak tests | Interaction: $F(15, 150) = 1.287, P = 0.2169$ ;<br>Time: $F(5.614, 56.14) = 2.050, P = 0.0781$ ;<br>Group: $F(1, 10) = 1.622, P = 0.2317$ .                                                                                                                                                             |            |
| Fig. 5M | EEG power ( $\mu V^2$ ) | Passed   | Two-way repeated ANOVA followed by post hoc Tukey's tests                                          | Interaction: $F(4, 50) = 2.802, P = 0.0355$ ;<br>Band: $F(4, 50) = 39.48, P < 0.0001$ ;<br>Group: $F(1, 50) = 6.645, P = 0.0129$ ;<br>For $\delta$ , $P = 0.0080$ ;<br>For $\beta$ , $P = 0.0628$ .                                                                                                     | Two-tailed |
| Fig. 5N | Number of FS/min        | Passed   | Paired T test                                                                                      | $t = 3.371, df = 5, P = 0.0119$ .                                                                                                                                                                                                                                                                       | Two-tailed |
| Fig. 5O | Number of GS/h          | Passed   | Paired T test                                                                                      | $t = 2.697, df = 5, P = 0.0429$ .                                                                                                                                                                                                                                                                       | Two-tailed |
| Fig. 5P | Seizure stage           | Passed   | Two-way repeated ANOVA with Geisser-Greenhouse's correction followed by post hoc Sidak tests       | Interaction: $F(15, 150) = 1.842, P = 0.0337$ ;<br>Time: $F(5.535, 55.35) = 20.89, P < 0.0001$ ;<br>Group: $F(1, 10) = 7.327, P = 0.0221$ .                                                                                                                                                             | Two-tailed |
| Fig. 6E | Spikes/min              | Passed   | Two-way repeated ANOVA with Geisser-Greenhouse's correction followed by post hoc Tukey's tests     | Interaction: $F(45, 300) = 0.7226, P = 0.9069$ ;<br>Time: $F(8.530, 170.6) = 0.5626, P = 0.8178$ ;<br>Group: $F(3, 20) = 24.11, P < 0.0001$ ;<br>For sham STN-DBS vs. STN-DBS, $P < 0.0001$ ;<br>For STN-DBS vs. STN-DBS+hM3Dq, $P < 0.0001$ ;<br>For STN-DBS+mCherry vs. STN-DBS+hM3Dq, $P < 0.0001$ . | Two-tailed |
| Fig. 6F | Spike amplitude (mV)    | Passed   | Two-way repeated ANOVA with Geisser-Greenhouse's correction followed by post hoc Tukey's tests     | Interaction: $F(45, 285) = 1.039, P = 0.4119$ ;<br>Time: $F(7.867, 149.5) = 0.6779, P = 0.7080$ ;<br>Group: $F(3, 19) = 9.480, P = 0.0005$ ;<br>For sham STN-DBS vs. STN-DBS, $P = 0.0030$ ;<br>For STN-DBS vs. STN-DBS+hM3Dq, $P = 0.0014$ ;<br>For STN-DBS+mCherry vs. STN-DBS+hM3Dq, $P = 0.0046$ .  | Two-tailed |
| Fig.    | EEG power               | Passed   | Two-way ANOVA                                                                                      | Interaction: $F(12, 100) = 1.577, P = 0.1104$                                                                                                                                                                                                                                                           | Two-tailed |

|         |                               |        |                                                                                                |                                                                                                                                                                                                                                                                                                                                                                                                                                                                          |            |
|---------|-------------------------------|--------|------------------------------------------------------------------------------------------------|--------------------------------------------------------------------------------------------------------------------------------------------------------------------------------------------------------------------------------------------------------------------------------------------------------------------------------------------------------------------------------------------------------------------------------------------------------------------------|------------|
| 6G      | (uV <sup>2</sup> )            |        | followed by post hoc Tukey's tests                                                             | Band: $F(4, 100) = 98.13$ , $P < 0.0001$<br>Group: $F(3, 100) = 9.725$ , $P < 0.0001$<br>For $\delta$ , sham STN-DBS vs. STN-DBS, $P = 0.0136$ ;<br>For $\delta$ , STN-DBS vs. STN-DBS+hM3Dq, $P = 0.0006$ ;<br>For $\delta$ , STN-DBS+mCherry vs. STN-DBS+hM3Dq, $P = 0.0056$ ;<br>For $\beta$ , sham STN-DBS vs. STN-DBS, $P = 0.0221$ ;<br>For $\beta$ , STN-DBS vs. STN-DBS+hM3Dq, $P = 0.0642$ ;<br>For $\beta$ , STN-DBS+mCherry vs. STN-DBS+hM3Dq, $P = 0.0028$ . |            |
| Fig. 6H | Latency to FS (min)           | Passed | One-way ANOVA followed by post hoc Tukey's tests                                               | $F(3, 20) = 5.335$ , $P = 0.0073$ ;<br>For sham STN-DBS vs. STN-DBS, $P = 0.0628$ ;<br>For STN-DBS vs. STN-DBS+hM3Dq, $P = 0.0204$ ;<br>For STN-DBS+mCherry vs. STN-DBS+hM3Dq, $P = 0.0405$ .                                                                                                                                                                                                                                                                            | Two-tailed |
| Fig. 6I | Latency to GS (min)           | Passed | One-way ANOVA followed by post hoc Tukey's tests                                               | $F(3, 20) = 13.64$ , $P < 0.0001$ ;<br>For sham STN-DBS vs. STN-DBS, $P = 0.0230$ ;<br>For STN-DBS vs. STN-DBS+hM3Dq, $P = 0.0009$ ;<br>For STN-DBS+mCherry vs. STN-DBS+hM3Dq, $P = 0.0001$ .                                                                                                                                                                                                                                                                            | Two-tailed |
| Fig. 6J | Number of FS/min              | Passed | One-way ANOVA followed by post hoc Tukey's tests                                               | $F(3, 20) = 5.026$ , $P = 0.0093$ ;<br>For sham STN-DBS vs. STN-DBS, $P = 0.0342$ ;<br>For STN-DBS vs. STN-DBS+hM3Dq, $P = 0.0224$ .                                                                                                                                                                                                                                                                                                                                     | Two-tailed |
| Fig. 6K | Number of GS/h                | Passed | One-way ANOVA followed by post hoc Tukey's tests                                               | $F(3, 20) = 8.307$ , $P = 0.0009$ ;<br>For sham STN-DBS vs. STN-DBS, $P = 0.0112$ ;<br>For STN-DBS vs. STN-DBS+hM3Dq, $P = 0.0021$ ;<br>For STN-DBS+mCherry vs. STN-DBS+hM3Dq, $P = 0.0148$ .                                                                                                                                                                                                                                                                            | Two-tailed |
| Fig. 6L | Seizure stage                 | Passed | Two-way repeated ANOVA with Geisser-Greenhouse's correction followed by post hoc Tukey's tests | Interaction: $F(45, 300) = 2.295$ , $P < 0.0001$ ;<br>Time: $F(7.550, 151.0) = 49.92$ , $P < 0.0001$ ;<br>Group: $F(3, 20) = 13.87$ , $P < 0.0001$ ;<br>For sham STN-DBS vs. STN-DBS, $P = 0.0256$ ;<br>For STN-DBS vs. STN-DBS+hM3Dq, $P = 0.0126$ ;<br>For STN-DBS+mCherry vs. STN-DBS+hM3Dq, $P = 0.0218$ .                                                                                                                                                           | Two-tailed |
| Fig. 7B | Relative concentrations of OA | Passed | One-way ANOVA followed by post hoc Tukey's tests                                               | $F(3, 20) = 23.97$ , $P < 0.0001$ ;<br>For saline vs. PNC, $P < 0.0001$ ;<br>For sham vs. STN-DBS, $P = 0.0013$ .                                                                                                                                                                                                                                                                                                                                                        | Two-tailed |
| Fig. 7C | Relative concentrations of OB | Passed | One-way ANOVA followed by post hoc Tukey's tests                                               | $F(3, 20) = 14.78$ , $P < 0.0001$ ;<br>For saline vs. PNC, $P = 0.0006$ ;<br>For sham vs. STN-DBS, $P = 0.0013$ .                                                                                                                                                                                                                                                                                                                                                        | Two-tailed |
| Fig.    | Relative                      | Passed | One-way ANOVA                                                                                  | $F(3, 20) = 11.15$ , $P = 0.0002$ ;                                                                                                                                                                                                                                                                                                                                                                                                                                      | Two-tailed |

|         |                                |        |                                                                                                |                                                                                                                                                                                                                                                                                                                                                                             |            |
|---------|--------------------------------|--------|------------------------------------------------------------------------------------------------|-----------------------------------------------------------------------------------------------------------------------------------------------------------------------------------------------------------------------------------------------------------------------------------------------------------------------------------------------------------------------------|------------|
| 7E      | protein level of OX1R          |        | followed by post hoc Tukey's tests                                                             | For saline vs. PNC, $P=0.0007$ ;<br>For sham vs. STN-DBS, $P=0.0485$ .                                                                                                                                                                                                                                                                                                      |            |
| Fig. 7F | Relative protein level of OX2R | Passed | One-way ANOVA followed by post hoc Tukey's tests                                               | $F(3, 20) = 20.41$ , $P<0.0001$ ;<br>For saline vs. PNC, $P<0.0001$ ;<br>For sham vs. STN-DBS, $P=0.0008$ .                                                                                                                                                                                                                                                                 | Two-tailed |
| Fig. 7J | Spikes/min                     | Passed | Two-way repeated ANOVA with Geisser-Greenhouse's correction followed by post hoc Tukey's tests | Interaction: $F(45, 300) = 1.001$ , $P=0.4757$ ;<br>Time: $F(8.771, 175.4) = 0.9904$ , $P=0.4487$ ;<br>Group: $F(3, 20) = 9.873$ , $P=0.0003$ ;<br>For VEH vs. SB-334867, $P=0.0329$ ;<br>For VEH vs. SB-334867+JNJ-10397049, $P<0.0001$ .                                                                                                                                  | Two-tailed |
| Fig. 7K | Spike amplitude (mV)           | Passed | Two-way repeated ANOVA with Geisser-Greenhouse's correction followed by post hoc Tukey's tests | Interaction: $F(45, 300) = 1.146$ , $P=0.2519$ ;<br>Time: $F(8.872, 177.4) = 0.8514$ , $P=0.5685$ ;<br>Group: $F(3, 20) = 11.06$ , $P=0.0002$ ;<br>For VEH vs. SB-334867, $P=0.0326$ ;<br>For VEH vs. JNJ-10397049, $P=0.0001$ ;<br>For VEH vs. SB-334867+JNJ-10397049, $P<0.0001$ .                                                                                        | Two-tailed |
| Fig. 7L | EEG power ( $\mu V^2$ )        | Passed | Two-way ANOVA followed by post hoc Tukey's tests                                               | Interaction: $F(12, 100) = 1.924$ , $P=0.0400$ ;<br>Band: $F(4, 100) = 85.46$ , $P<0.0001$ ;<br>Group: $F(3, 100) = 8.551$ , $P<0.0001$ ;<br>For $\delta$ , VEH vs. SB-334867+JNJ-10397049, $P=0.0018$ ;<br>For $\beta$ , VEH vs. SB-334867, $P=0.0128$ ;<br>For $\beta$ , VEH vs. JNJ-10397049, $P<0.0001$ ;<br>For $\beta$ , VEH vs. SB-334867+JNJ-10397049, $P<0.0001$ . | Two-tailed |
| Fig. 7M | Latency to FS (min)            | Passed | One-way ANOVA followed by post hoc Tukey's tests                                               | $F(3, 20) = 8.057$ , $P=0.0010$ ;<br>For VEH vs. SB-334867+JNJ-10397049, $P=0.0005$ .                                                                                                                                                                                                                                                                                       | Two-tailed |
| Fig. 7N | Latency to GS (min)            | Passed | One-way ANOVA followed by post hoc Tukey's tests                                               | $F(3, 20) = 4.233$ , $P=0.0180$ ;<br>For VEH vs. SB-334867+JNJ-10397049, $P=0.0106$ .                                                                                                                                                                                                                                                                                       | Two-tailed |
| Fig. 7O | Number of FS/min               | Passed | One-way ANOVA followed by post hoc Tukey's tests                                               | $F(3, 20) = 3.688$ , $P=0.0291$ ;<br>For VEH vs. SB-334867+JNJ-10397049, $P=0.0219$ .                                                                                                                                                                                                                                                                                       | Two-tailed |
| Fig. 7P | Number of GS/h                 | Passed | One-way ANOVA followed by post hoc Tukey's tests                                               | $F(3, 20) = 4.258$ , $P=0.0177$ ;<br>For VEH vs. SB-334867+JNJ-10397049, $P=0.0133$ .                                                                                                                                                                                                                                                                                       | Two-tailed |
| Fig. 7Q | Seizure stage                  | Passed | Two-way repeated ANOVA with Geisser-Greenhouse's correction followed by post hoc Tukey's tests | Interaction: $F(45, 300) = 1.287$ , $P=0.1144$ ;<br>Time: $F(7.847, 156.9) = 25.55$ , $P<0.0001$ ;<br>Group: $F(3, 20) = 9.018$ , $P=0.0006$ ;<br>For VEH vs. SB-334867+JNJ-10397049, $P=0.0010$ .                                                                                                                                                                          | Two-tailed |

|          |                         |        |                                                  |                                                                                                                                                                         |            |
|----------|-------------------------|--------|--------------------------------------------------|-------------------------------------------------------------------------------------------------------------------------------------------------------------------------|------------|
| sFig. 1D | Adjusted number of GS/h | Passed | One-way ANOVA followed by post hoc Tukey's tests | F (2, 15) = 10.47, P=0.0014;<br>For sham vs. ipsi, P=0.0084,<br>For sham vs. bi, P=0.0017.                                                                              | Two-tailed |
| sFig. 2E | Number of FS/min        | Passed | Paired T tests                                   | For CNO vs. pre, t=3.639, df=5, P=0.0149;<br>For CNO vs. post, t=4.899, df=3, P=0.0163.                                                                                 | Two-tailed |
| sFig. 2F | Latency to FS (min)     | Passed | Paired T tests                                   | For CNO vs. pre, t=5.000, df=5, P=0.0041;<br>For CNO vs. post, t=3.656, df=3, P=0.0354.                                                                                 | Two-tailed |
| sFig. 2G | Number of GS/h          | Passed | Paired T tests                                   | For CNO vs. pre, t=6.220, df=5, P=0.0016;<br>For CNO vs. post, t=3.220, df=3, P=0.0486.                                                                                 | Two-tailed |
| sFig. 2H | Latency to GS (min)     | Passed | Paired T tests                                   | For CNO vs. pre, t=5.918, df=5, P=0.0020;<br>For CNO vs. post, t=2.875, df=3, P=0.0638.                                                                                 | Two-tailed |
| sFig. 2I | Number of FS/min        | Passed | Paired T tests                                   | For CNO vs. pre, t=2.666, df=5, P=0.0446;<br>For CNO vs. post, t=3.124, df=5, P=0.0261.                                                                                 | Two-tailed |
| sFig. 2J | Latency to FS (min)     | Passed | Paired T tests                                   | For CNO vs. pre, t=3.140, df=5, P=0.0257;<br>For CNO vs. post, t=3.162, df=5, P=0.0250.                                                                                 | Two-tailed |
| sFig. 2K | Number of GS/h          | Passed | Paired T tests                                   | For CNO vs. pre, t=3.997, df=5, P=0.0104;<br>For CNO vs. post, t=4.339, df=5, P=0.0074.                                                                                 | Two-tailed |
| sFig. 2L | Latency to GS (min)     | Passed | Paired T tests                                   | For CNO vs. pre, t=4.052, df=5, P=0.0098;<br>For CNO vs. post, t=4.382, df=5, P=0.0071.                                                                                 | Two-tailed |
| sFig. 3A | Adjusted number of GS/h | Passed | One-way ANOVA followed by post hoc Tukey's tests | F (4, 25) = 11.10, P<0.0001;<br>For mCherry+CNO vs. hM3Dq+CNO, P=0.0011,<br>For hM3Dq+saline vs. hM3Dq+CNO, P=0.0072,<br>For hM4Di+saline vs. hM4Di+CNO, P=0.0258.      | Two-tailed |
| sFig. 3B | Adjusted number of GS/h | Passed | One-way ANOVA followed by post hoc Tukey's tests | F (3, 20) = 10.26, P=0.0003;<br>For sham STN-DBS vs. STN-DBS, P=0.0078,<br>For STN-DBS vs. STN-DBS+hM3Dq, P=0.0007,<br>For STN-DBS+mCherry vs. STN-DBS+hM3Dq, P=0.0040. | Two-tailed |
| sFig. 3B | Adjusted number of GS/h | Passed | One-way ANOVA followed by post hoc Tukey's tests | F (3, 20) = 5.022, P=0.0093;<br>For VEH vs. SB-334867+JNJ-10397049, P=0.0056.                                                                                           | Two-tailed |
